# Supplementary material for: Benzothiazole integrated into a cryptand for ESIPT-based selective chemosensor for Zn2+ ions
Source: Royal Society of Chemistry journal article supplement (doi:10.1039/c9dt00548j), 2019-01-01
Supplement: c9dt00548j1.pdf [file c9dt00548j1.pdf]

**Benzothiazole integrated into a cryptand for ESIPT based selective  
chemosensor for the Zn<sup>2+</sup> ion**

**Mayank Gupta, Sunanda Sahana, Vivekanand Sharma and Parimal K. Bharadwaj\***

*Department of Chemistry, Indian Institute of Technology Kanpur, Kanpur 208016, India*

**Table S1.** The crystal and refinement data of **L**.

| Parameters                                                      | L                                                                               |
|-----------------------------------------------------------------|---------------------------------------------------------------------------------|
| Empirical formula                                               | C <sub>114</sub> H <sub>125</sub> N <sub>22</sub> O <sub>7</sub> S <sub>6</sub> |
| Formula wt.                                                     | 2107.71                                                                         |
| Temperature (K)                                                 | 100(2)                                                                          |
| Radiation Source                                                | Mo K $\alpha$                                                                   |
| Wavelength (Å)                                                  | 0.71073                                                                         |
| Crystal system                                                  | Monoclinic                                                                      |
| Space group                                                     | <i>C</i> 2/c                                                                    |
| <i>a</i> , Å                                                    | 35.135(11)                                                                      |
| <i>b</i> , Å                                                    | 14.185(4)                                                                       |
| <i>c</i> , Å                                                    | 24.132(6)                                                                       |
| $\alpha$ (°)                                                    | 90                                                                              |
| $\beta$ (°)                                                     | 112.963(11)                                                                     |
| $\gamma$ (°)                                                    | 90                                                                              |
| <i>U</i> , Å <sup>3</sup>                                       | 11074(5)                                                                        |
| <i>Z</i>                                                        | 4                                                                               |
| $\rho_{\text{calc}}$ (g/cm <sup>3</sup> )                       | 1.264                                                                           |
| $\mu$ , mm <sup>-1</sup>                                        | 0.189                                                                           |
| <i>F</i> (000)                                                  | 4460.0                                                                          |
| Refl. Collected                                                 | 64632                                                                           |
| <i>R</i> <sub>int</sub>                                         | 0.1438                                                                          |
| Independent refl.                                               | 9751                                                                            |
| Refinement method                                               | Full-matrix least-squares on <i>F</i> <sup>2</sup>                              |
| GOOF                                                            | 1.021                                                                           |
| Final <i>R</i> indices<br>[ <i>I</i> > 2 $\sigma$ ( <i>I</i> )] | <i>R</i> <sub>1</sub> = 0.0831<br><i>wR</i> <sub>2</sub> = 0.2108               |
| <i>R</i> indices<br>(all data)                                  | <i>R</i> <sub>1</sub> = 0.1492<br><i>wR</i> <sub>2</sub> = 0.2607               |

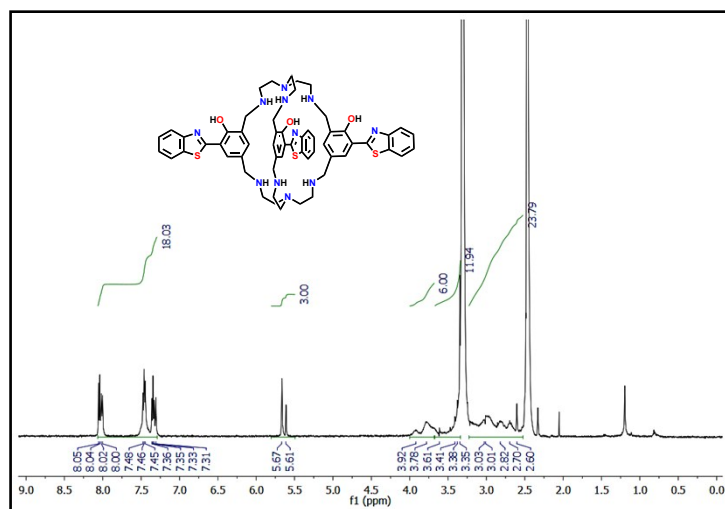

Figure S1. <sup>1</sup>H NMR spectrum of L.

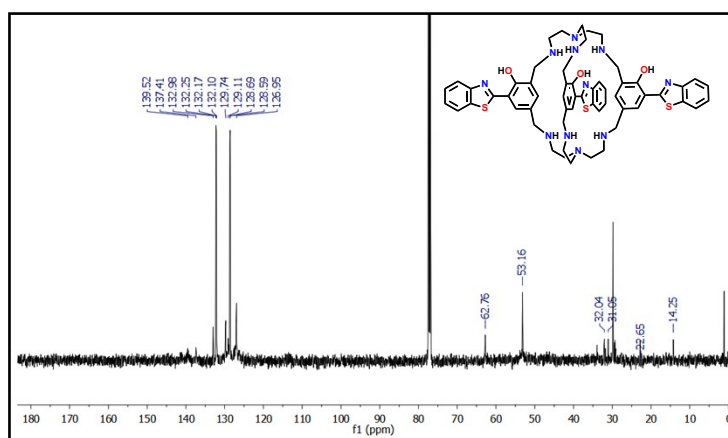

Figure S2. <sup>13</sup>C NMR spectrum of L.

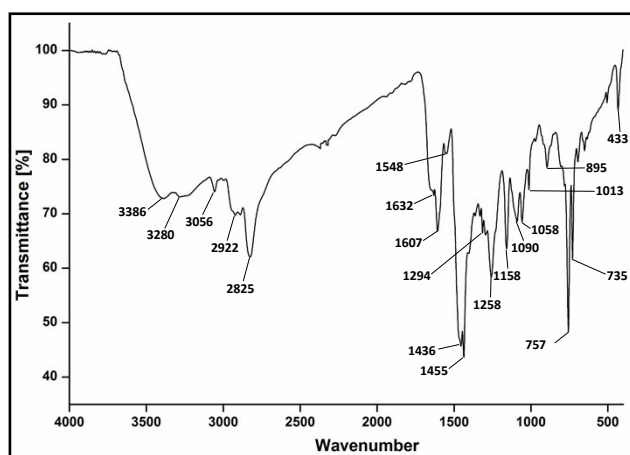

Figure S3. IR spectrum of L.

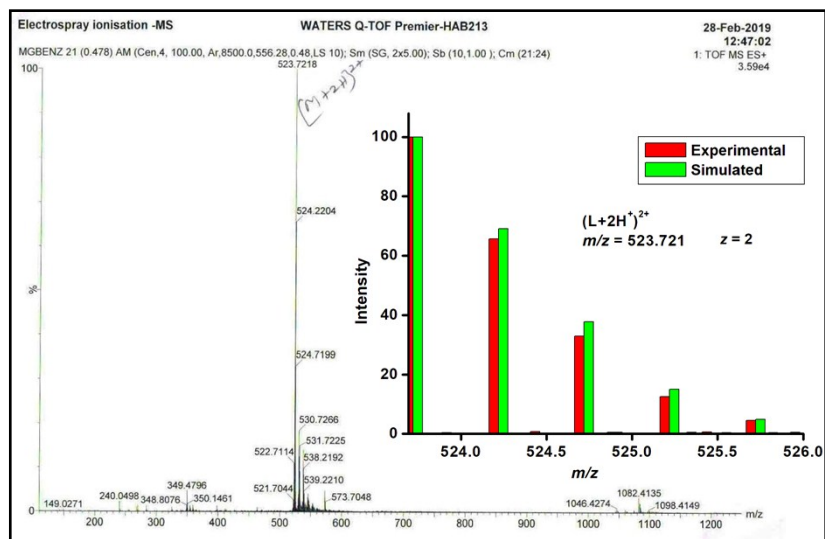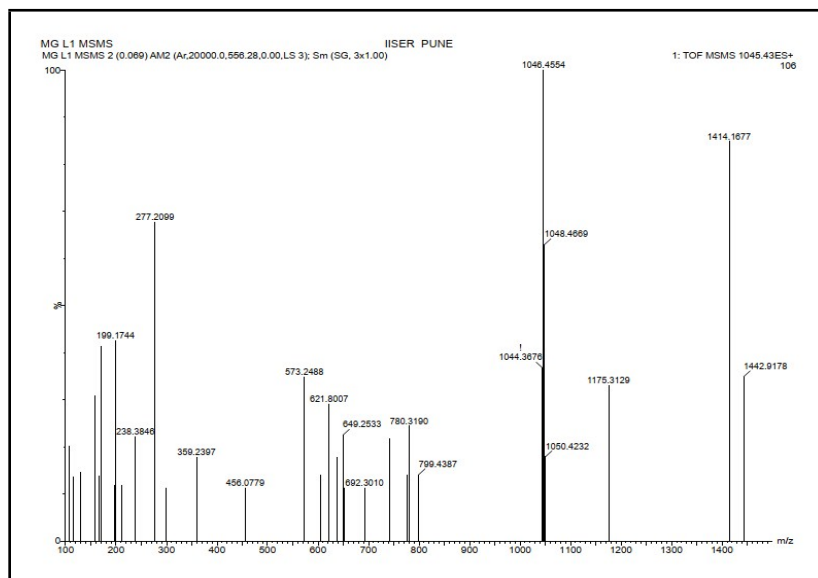

Figure S4. ESI-MS, (above) and MS/MS (below) spectra of L (positive mode).

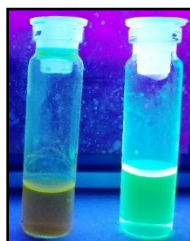

Figure S5. Color of the solution changes from yellow to fluorescent green upon addition of  $Zn^{2+}$ .

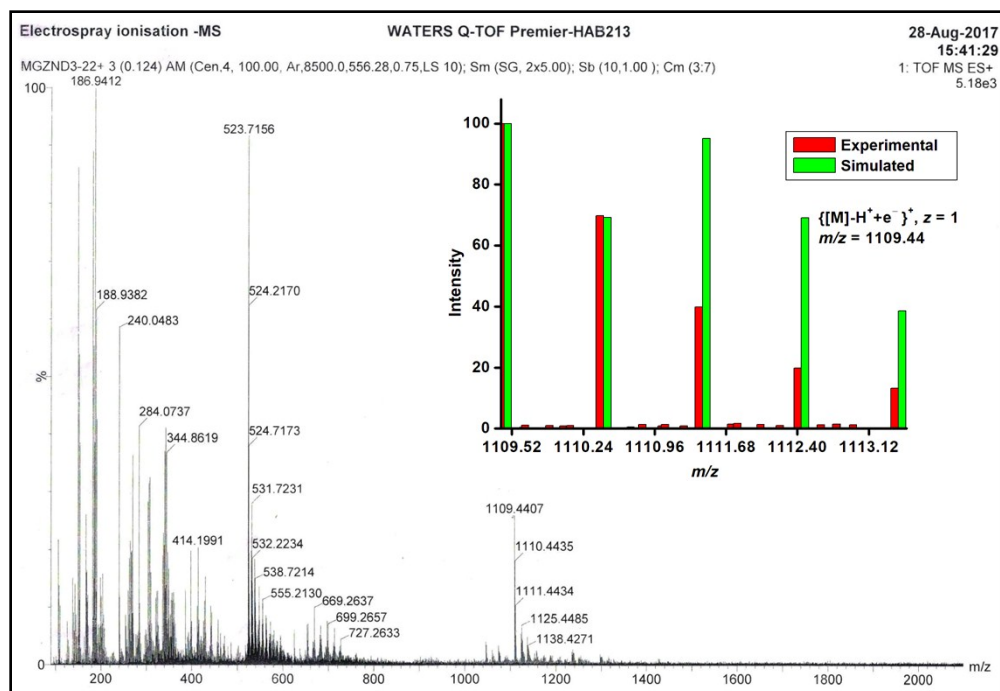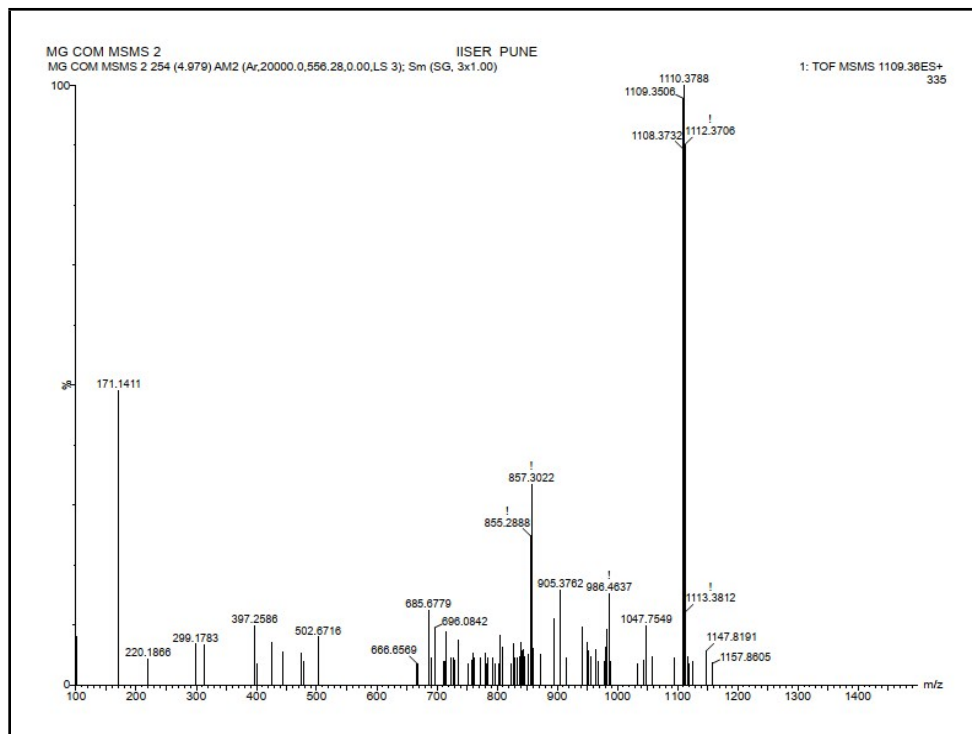

Figure S6. ESI-MS (above) and MS/MS spectra after addition of Zn<sup>2+</sup> in crptand L (positive mode).

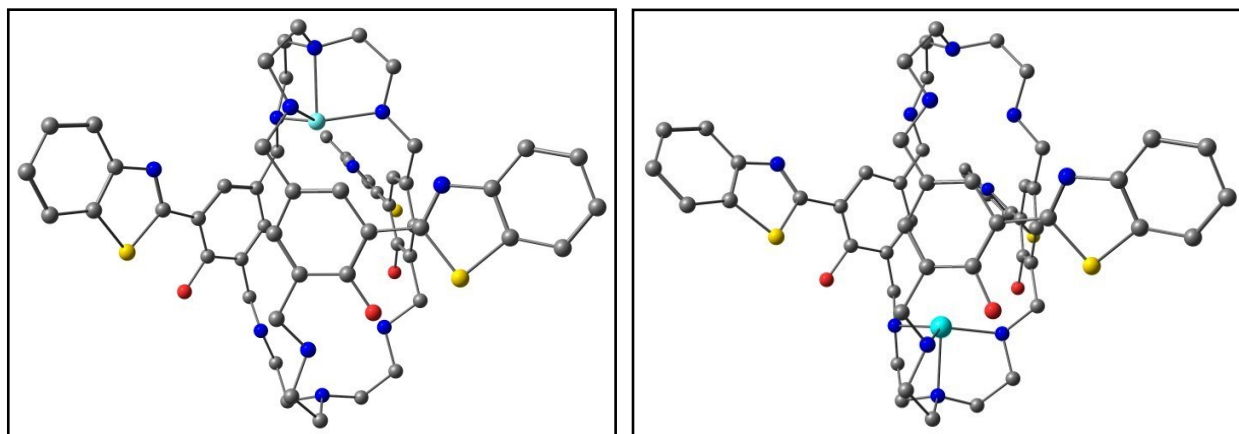

**Figure S7.** Optimized structures of Cryptand having metal at side cavity 1 (left) and cavity 2 (right).

### Coordinates

#### Metal free Cryptand

| Serial No. | Atomic No. | Coordinates (Angstroms) |          |          |
|------------|------------|-------------------------|----------|----------|
|            |            | X                       | Y        | Z        |
| 1          | 16         | 2.720478                | -5.10529 | -0.55721 |
| 2          | 16         | -5.86239                | 0.410725 | 1.122797 |
| 3          | 16         | 3.938153                | 4.379329 | -1.77513 |
| 4          | 8          | -3.69165                | 1.838048 | 2.061326 |
| 5          | 1          | -3.06443                | 2.130312 | 2.789559 |
| 6          | 8          | 0.619417                | -3.84533 | -1.85055 |
| 7          | 1          | 0.170881                | -3.38902 | -2.64394 |
| 8          | 7          | 2.500174                | -4.15947 | 1.873062 |
| 9          | 7          | 0.341582                | -1.05879 | -5.50739 |
| 10         | 7          | -1.05331                | 1.114277 | -3.82257 |
| 11         | 7          | 2.691294                | -0.52911 | -3.55893 |
| 12         | 7          | -5.05702                | -0.30969 | -1.26092 |
| 13         | 7          | -0.28395                | 1.131403 | 5.485993 |
| 14         | 7          | -0.93595                | -2.35526 | -3.30765 |
| 15         | 7          | -1.10932                | -1.17938 | 3.761476 |
| 16         | 1          | -0.44753                | -1.89831 | 4.048634 |
| 17         | 6          | -3.46538                | 1.213134 | -0.23397 |
| 18         | 6          | -1.50221                | 1.948079 | -1.49738 |
| 19         | 7          | -1.4767                 | 2.594875 | 3.289692 |
| 20         | 6          | -2.98607                | 1.890841 | 0.905194 |
| 21         | 6          | -1.27379                | -2.2996  | 1.535509 |
| 22         | 6          | -0.07354                | -2.99107 | 1.6419   |

|    |   |          |          |          |
|----|---|----------|----------|----------|
| 23 | 1 | 0.407134 | -3.15365 | 2.600617 |
| 24 | 6 | 0.591497 | -3.51333 | 0.514524 |
| 25 | 6 | -1.24043 | -2.68232 | -0.87828 |
| 26 | 6 | -1.05197 | 2.623182 | -0.3493  |
| 27 | 1 | -0.11676 | 3.17727  | -0.37935 |
| 28 | 6 | -2.70289 | 1.259286 | -1.42328 |
| 29 | 1 | -3.08979 | 0.712094 | -2.27387 |
| 30 | 6 | 1.880539 | -4.17991 | 0.721175 |
| 31 | 6 | 3.975844 | -5.49128 | 0.599243 |
| 32 | 6 | -0.64433 | 2.016523 | -2.74534 |
| 33 | 1 | -0.59974 | 3.071436 | -3.08127 |
| 34 | 1 | 0.381925 | 1.743048 | -2.47365 |
| 35 | 6 | -1.84085 | -2.15544 | 0.259032 |
| 36 | 1 | -2.78211 | -1.62474 | 0.148564 |
| 37 | 6 | -0.23591 | 1.304524 | -5.02505 |
| 38 | 1 | -0.47618 | 2.244651 | -5.55511 |
| 39 | 1 | 0.808088 | 1.378435 | -4.70368 |
| 40 | 6 | -4.70406 | 0.429422 | -0.24124 |
| 41 | 7 | 1.814291 | 0.550346 | 3.552564 |
| 42 | 1 | 0.868863 | 0.223455 | 3.335377 |
| 43 | 6 | -1.76816 | 2.606935 | 0.839995 |
| 44 | 6 | -0.35781 | 0.125065 | -5.99616 |
| 45 | 1 | -1.41845 | -0.11839 | -6.12862 |
| 46 | 1 | 0.008686 | 0.436674 | -6.99142 |
| 47 | 6 | -0.00342 | -3.35702 | -0.75576 |
| 48 | 6 | 3.673781 | -4.88415 | 1.842276 |
| 49 | 6 | -2.00523 | -1.7535  | 2.745448 |
| 50 | 1 | -2.69111 | -0.96153 | 2.424637 |
| 51 | 1 | -2.6421  | -2.54908 | 3.178936 |
| 52 | 6 | -1.47281 | -2.52031 | -4.66062 |
| 53 | 1 | -2.30123 | -1.81811 | -4.8494  |
| 54 | 1 | -1.88445 | -3.53195 | -4.76295 |
| 55 | 6 | -1.91894 | -2.59411 | -2.23163 |
| 56 | 1 | -2.40076 | -3.55818 | -2.45098 |
| 57 | 1 | -2.71714 | -1.83951 | -2.20904 |
| 58 | 6 | 1.774068 | -1.10009 | -5.79441 |
| 59 | 1 | 2.101073 | -0.09547 | -6.08805 |
| 60 | 1 | 1.995504 | -1.75323 | -6.65797 |
| 61 | 6 | 5.995499 | -6.40149 | 1.511497 |
| 62 | 1 | 6.901285 | -6.9899  | 1.398256 |
| 63 | 6 | 3.166598 | -1.02853 | -2.26667 |

|     |   |          |          |          |
|-----|---|----------|----------|----------|
| 64  | 1 | 4.215763 | -1.38257 | -2.30915 |
| 65  | 1 | 2.567899 | -1.91182 | -2.01994 |
| 66  | 6 | 2.621559 | -1.55775 | -4.59717 |
| 67  | 1 | 2.164228 | -2.45012 | -4.15601 |
| 68  | 1 | 3.617332 | -1.87049 | -4.96474 |
| 69  | 6 | 5.137443 | -6.24955 | 0.425412 |
| 70  | 1 | 5.366208 | -6.71178 | -0.52998 |
| 71  | 6 | 2.038745 | 0.366772 | 4.988803 |
| 72  | 1 | 3.081279 | 0.620624 | 5.215521 |
| 73  | 1 | 1.904748 | -0.6846  | 5.295235 |
| 74  | 6 | -0.35449 | -2.32529 | -5.69158 |
| 75  | 1 | 0.372094 | -3.13311 | -5.55518 |
| 76  | 1 | -0.77202 | -2.44388 | -6.70961 |
| 77  | 6 | 1.131181 | 1.291787 | 5.810333 |
| 78  | 1 | 1.338976 | 1.135769 | 6.886149 |
| 79  | 1 | 1.412685 | 2.324721 | 5.582122 |
| 80  | 6 | -0.89725 | -0.10187 | 5.979548 |
| 81  | 1 | -1.44704 | 0.061828 | 6.9223   |
| 82  | 1 | -0.10423 | -0.82007 | 6.218261 |
| 83  | 6 | -1.03389 | 3.287011 | 4.502535 |
| 84  | 1 | -1.6901  | 4.146035 | 4.68931  |
| 85  | 1 | -0.01268 | 3.68612  | 4.383732 |
| 86  | 6 | -1.83873 | -0.73849 | 4.952543 |
| 87  | 1 | -2.39612 | -1.55995 | 5.440574 |
| 88  | 1 | -2.58763 | -0.00351 | 4.63344  |
| 89  | 6 | -1.09649 | 2.331753 | 5.698521 |
| 90  | 1 | -0.81084 | 2.872198 | 6.618119 |
| 91  | 1 | -2.13793 | 2.019717 | 5.826432 |
| 92  | 6 | 4.553116 | -5.04728 | 2.925597 |
| 93  | 1 | 4.316183 | -4.5815  | 3.876883 |
| 94  | 6 | 5.704631 | -5.80418 | 2.751545 |
| 95  | 1 | 6.390721 | -5.93838 | 3.582733 |
| 96  | 6 | 2.778299 | 3.705732 | -0.57613 |
| 97  | 6 | -1.26464 | 3.369513 | 2.048308 |
| 98  | 1 | -0.20969 | 3.641592 | 1.903431 |
| 99  | 1 | -1.83008 | 4.30647  | 2.159331 |
| 100 | 6 | 3.224889 | 5.956309 | -1.5249  |
| 101 | 6 | 2.193362 | 5.850797 | -0.55817 |
| 102 | 6 | 1.473057 | 6.997027 | -0.18907 |
| 103 | 1 | 0.68312  | 6.910574 | 0.549775 |
| 104 | 6 | 1.790233 | 8.214283 | -0.7795  |



|     |   |          |          |          |
|-----|---|----------|----------|----------|
| 105 | 1 | 1.239387 | 9.10731  | -0.49952 |
| 106 | 6 | 2.816204 | 8.306159 | -1.73615 |
| 107 | 1 | 3.048354 | 9.267749 | -2.18434 |
| 108 | 6 | 3.54173  | 7.180507 | -2.11925 |
| 109 | 1 | 4.332624 | 7.25604  | -2.85879 |
| 110 | 6 | 2.791825 | -0.14625 | 2.687697 |
| 111 | 1 | 2.65543  | -1.23731 | 2.686357 |
| 112 | 1 | 3.784868 | 0.047066 | 3.118458 |
| 113 | 6 | -6.26912 | -0.93469 | -1.05407 |
| 114 | 6 | -6.88235 | -0.66539 | 0.193444 |
| 115 | 6 | -8.11126 | -1.23685 | 0.536256 |
| 116 | 1 | -8.57752 | -1.02838 | 1.494338 |
| 117 | 6 | -8.7269  | -2.08066 | -0.38473 |
| 118 | 1 | -9.6834  | -2.53258 | -0.1389  |
| 119 | 6 | -8.12734 | -2.35433 | -1.62756 |
| 120 | 1 | -8.62874 | -3.01596 | -2.32792 |
| 121 | 6 | -6.90516 | -1.78975 | -1.96935 |
| 122 | 1 | -6.43154 | -1.99189 | -2.92474 |
| 123 | 6 | 2.681389 | 1.77645  | 1.032356 |
| 124 | 6 | 2.814435 | 2.265196 | -0.28701 |
| 125 | 6 | 2.993583 | 1.350897 | -1.34306 |
| 126 | 6 | 3.024323 | -0.0246  | -1.13525 |
| 127 | 6 | 2.923538 | -0.48383 | 0.186039 |
| 128 | 1 | 2.961498 | -1.55228 | 0.383351 |
| 129 | 6 | 2.771562 | 0.38251  | 1.264891 |
| 130 | 7 | 1.974119 | 4.580577 | -0.05528 |
| 131 | 8 | 2.500476 | 2.632771 | 2.058602 |
| 132 | 1 | 2.190866 | 2.065992 | 2.825051 |
| 133 | 1 | -2.02467 | 1.304652 | -4.06279 |
| 134 | 1 | 3.310414 | 0.210478 | -3.88302 |
| 135 | 1 | -0.94977 | 1.721421 | 3.239419 |
| 136 | 1 | -0.57284 | -1.39926 | -3.2477  |
| 137 | 1 | 3.05318  | 1.747561 | -2.35141 |

### Cryptand with metal (Outside)

| Serial No. | Atomic No. | Coordinates (Angstroms) |          |          |
|------------|------------|-------------------------|----------|----------|
|            |            | X                       | Y        | Z        |
| 1          | 16         | -3.85649                | 4.9666   | -0.26736 |
| 2          | 16         | -2.88601                | -5.02544 | -2.3821  |
| 3          | 16         | 3.549752                | -0.02906 | 4.320948 |

|    |   |          |          |          |
|----|---|----------|----------|----------|
| 4  | 8 | -0.298   | -4.08991 | -2.17613 |
| 5  | 1 | 0.531924 | -3.69081 | -2.58458 |
| 6  | 8 | -4.3578  | 2.382015 | 0.562741 |
| 7  | 1 | -2.6146  | 3.670647 | 4.406462 |
| 8  | 7 | -2.16246 | 4.597055 | -2.22821 |
| 9  | 7 | -3.68769 | 0.439727 | 4.65625  |
| 10 | 7 | -1.9093  | -1.8483  | 3.67359  |
| 11 | 7 | -1.3047  | 2.190356 | 3.574669 |
| 12 | 7 | -3.96995 | -4.16353 | -0.16183 |
| 13 | 7 | 2.814795 | -0.4276  | -4.11196 |
| 14 | 7 | -4.35498 | 0.138832 | 1.903309 |
| 15 | 7 | -0.12062 | 0.047978 | -3.64892 |
| 16 | 1 | -0.05245 | 1.055173 | -3.50598 |
| 17 | 6 | -1.5926  | -3.66449 | -0.21276 |
| 18 | 6 | -0.54326 | -2.55342 | 1.701693 |
| 19 | 7 | 1.950686 | -2.66656 | -2.41487 |
| 20 | 6 | -0.36936 | -3.61673 | -0.90908 |
| 21 | 6 | -2.27529 | 0.383614 | -2.44982 |
| 22 | 6 | -2.31588 | 1.774021 | -2.40868 |
| 23 | 1 | -1.82053 | 2.372884 | -3.16758 |
| 24 | 6 | -2.99094 | 2.473349 | -1.39127 |
| 25 | 6 | -3.68438 | 0.316041 | -0.45602 |
| 26 | 6 | 0.670576 | -2.54675 | 0.994471 |
| 27 | 1 | 1.556596 | -2.11464 | 1.457771 |
| 28 | 6 | -1.65058 | -3.12414 | 1.091693 |
| 29 | 1 | -2.60959 | -3.14771 | 1.59368  |
| 30 | 6 | -2.91973 | 3.938982 | -1.39067 |
| 31 | 6 | -3.1549  | 6.37468  | -1.0331  |
| 32 | 6 | -0.57643 | -1.92539 | 3.081699 |
| 33 | 1 | 0.145667 | -2.45895 | 3.732536 |
| 34 | 1 | -0.20649 | -0.89537 | 3.002941 |
| 35 | 6 | -2.9638  | -0.32964 | -1.45673 |
| 36 | 1 | -2.94914 | -1.41581 | -1.47233 |
| 37 | 6 | -1.89262 | -1.2352  | 5.004266 |
| 38 | 1 | -1.49828 | -1.91647 | 5.781423 |
| 39 | 1 | -1.21866 | -0.37331 | 4.960397 |
| 40 | 6 | -2.82349 | -4.21808 | -0.78764 |
| 41 | 7 | 3.221224 | 1.492964 | -1.8223  |
| 42 | 1 | 2.441331 | 0.841531 | -1.95115 |
| 43 | 6 | 0.777256 | -3.07176 | -0.28584 |
| 44 | 6 | -3.28349 | -0.73815 | 5.415062 |

|    |   |          |          |          |
|----|---|----------|----------|----------|
| 45 | 1 | -4.01293 | -1.53778 | 5.237212 |
| 46 | 1 | -3.2938  | -0.54886 | 6.504769 |
| 47 | 6 | -3.68933 | 1.730089 | -0.41515 |
| 48 | 6 | -2.2702  | 5.961643 | -2.05872 |
| 49 | 6 | -1.5443  | -0.33214 | -3.56601 |
| 50 | 1 | -1.59987 | -1.41686 | -3.41411 |
| 51 | 1 | -2.05974 | -0.1223  | -4.52353 |
| 52 | 6 | -5.27897 | -0.35491 | 2.925885 |
| 53 | 1 | -5.13347 | -1.4311  | 3.115354 |
| 54 | 1 | -6.30917 | -0.22432 | 2.571268 |
| 55 | 6 | -4.50259 | -0.45926 | 0.560836 |
| 56 | 1 | -5.56804 | -0.38503 | 0.297532 |
| 57 | 1 | -4.24323 | -1.5263  | 0.537029 |
| 58 | 6 | -3.17833 | 1.716384 | 5.155148 |
| 59 | 1 | -2.37523 | 1.515803 | 5.874741 |
| 60 | 1 | -3.95687 | 2.267791 | 5.713125 |
| 61 | 6 | -2.66544 | 8.671458 | -1.508   |
| 62 | 1 | -2.80985 | 9.729234 | -1.30605 |
| 63 | 6 | -0.97257 | 2.735385 | 2.256029 |
| 64 | 1 | -1.12322 | 3.831921 | 2.210088 |
| 65 | 1 | -1.68521 | 2.314107 | 1.537292 |
| 66 | 6 | -2.62636 | 2.625788 | 4.045192 |
| 67 | 1 | -4.50022 | 1.689632 | 1.297527 |
| 68 | 1 | -3.31189 | 2.604695 | 3.192198 |
| 69 | 6 | -3.35625 | 7.729161 | -0.75039 |
| 70 | 1 | -4.03514 | 8.041628 | 0.037819 |
| 71 | 6 | 3.848266 | 1.662201 | -3.15929 |
| 72 | 1 | 4.825612 | 2.139032 | -3.02567 |
| 73 | 1 | 3.242478 | 2.352097 | -3.76447 |
| 74 | 6 | -5.07756 | 0.455981 | 4.214256 |
| 75 | 1 | -5.35624 | 1.494295 | 4.003714 |
| 76 | 1 | -5.77425 | 0.091216 | 4.991933 |
| 77 | 6 | 4.048899 | 0.337727 | -3.90339 |
| 78 | 1 | 4.562819 | 0.562058 | -4.85784 |
| 79 | 1 | 4.724867 | -0.29351 | -3.32227 |
| 80 | 6 | 1.905486 | 0.180914 | -5.08924 |
| 81 | 1 | 2.240407 | -0.00303 | -6.12757 |
| 82 | 1 | 1.928858 | 1.268228 | -4.9531  |
| 83 | 6 | 3.216408 | -2.69591 | -3.16163 |
| 84 | 1 | 3.440644 | -3.73167 | -3.44801 |
| 85 | 1 | 4.054145 | -2.34714 | -2.53963 |

|     |   |          |          |          |
|-----|---|----------|----------|----------|
| 86  | 6 | 0.451679 | -0.28098 | -4.95227 |
| 87  | 1 | -0.11896 | 0.16216  | -5.79184 |
| 88  | 1 | 0.378315 | -1.36785 | -5.08319 |
| 89  | 6 | 3.103299 | -1.84039 | -4.42241 |
| 90  | 1 | 4.024495 | -1.93929 | -5.02102 |
| 91  | 1 | 2.288023 | -2.23666 | -5.03431 |
| 92  | 6 | -1.58109 | 6.927528 | -2.81123 |
| 93  | 1 | -0.90539 | 6.606073 | -3.59799 |
| 94  | 6 | -1.78468 | 8.272526 | -2.53043 |
| 95  | 1 | -1.25828 | 9.028243 | -3.10694 |
| 96  | 6 | 3.571952 | 0.528771 | 2.647178 |
| 97  | 6 | 2.101678 | -3.09882 | -1.01341 |
| 98  | 1 | 2.845662 | -2.49576 | -0.4688  |
| 99  | 1 | 2.493832 | -4.12618 | -1.03878 |
| 100 | 6 | 4.677833 | -1.30458 | 3.90184  |
| 101 | 6 | 5.002533 | -1.21153 | 2.52869  |
| 102 | 6 | 5.88135  | -2.14842 | 1.962226 |
| 103 | 1 | 6.10812  | -2.10474 | 0.902475 |
| 104 | 6 | 6.422447 | -3.13625 | 2.777402 |
| 105 | 1 | 7.103436 | -3.86504 | 2.347642 |
| 106 | 6 | 6.101975 | -3.21044 | 4.143218 |
| 107 | 1 | 6.540348 | -3.99052 | 4.758693 |
| 108 | 6 | 5.222135 | -2.29686 | 4.718707 |
| 109 | 1 | 4.966778 | -2.35646 | 5.772258 |
| 110 | 6 | 2.641289 | 2.812147 | -1.34914 |
| 111 | 1 | 1.835168 | 3.118336 | -2.02889 |
| 112 | 1 | 3.451146 | 3.543751 | -1.42116 |
| 113 | 6 | -4.98281 | -4.7609  | -0.88265 |
| 114 | 6 | -4.59526 | -5.30337 | -2.13166 |
| 115 | 6 | -5.52135 | -5.93593 | -2.96667 |
| 116 | 1 | -5.22038 | -6.35008 | -3.92457 |
| 117 | 6 | -6.84341 | -6.02433 | -2.53821 |
| 118 | 1 | -7.57837 | -6.51388 | -3.17118 |
| 119 | 6 | -7.23953 | -5.48924 | -1.29845 |
| 120 | 1 | -8.27757 | -5.57189 | -0.98831 |
| 121 | 6 | -6.32171 | -4.8587  | -0.46827 |
| 122 | 1 | -6.61329 | -4.44206 | 0.491022 |
| 123 | 6 | 3.149623 | 2.26776  | 0.98652  |
| 124 | 6 | 2.703427 | 1.584264 | 2.151375 |
| 125 | 6 | 1.367563 | 1.745232 | 2.579231 |
| 126 | 6 | 0.444041 | 2.437513 | 1.799947 |

|     |    |          |          |          |
|-----|----|----------|----------|----------|
| 127 | 6  | 0.834912 | 2.810434 | 0.492349 |
| 128 | 1  | 0.079192 | 3.1787   | -0.20088 |
| 129 | 6  | 2.151713 | 2.690145 | 0.069393 |
| 130 | 7  | 4.368486 | -0.17237 | 1.854677 |
| 131 | 8  | 4.419775 | 2.369752 | 0.671178 |
| 132 | 1  | -2.29511 | -2.7889  | 3.751859 |
| 133 | 1  | -0.6088  | 2.519642 | 4.24381  |
| 134 | 1  | 1.583672 | -1.71072 | -2.44398 |
| 135 | 1  | -3.40875 | -0.02012 | 2.260269 |
| 136 | 1  | 1.03666  | 1.260338 | 3.49345  |
| 137 | 30 | 4.745839 | 0.694615 | -0.25028 |
| 138 | 7  | 6.664857 | -0.47259 | -1.44342 |
| 139 | 8  | 7.566261 | -1.06148 | -1.99597 |
| 140 | 8  | 5.547274 | -1.06552 | -1.12684 |
| 141 | 8  | 6.715222 | 0.767122 | -1.12513 |

### Cryptand with Metal (Cavity 1)

| Serial No. | Atomic No. | Coordinates (Angstroms) |          |          |
|------------|------------|-------------------------|----------|----------|
|            |            | X                       | Y        | Z        |
| 1          | 16         | 1.666889                | 5.515089 | 0.205807 |
| 2          | 16         | 5.270196                | -3.6292  | 0.53258  |
| 3          | 8          | 0.306062                | 3.775536 | 1.937736 |
| 4          | 1          | 0.083957                | 3.319974 | 2.849682 |
| 5          | 7          | 1.160864                | 4.382903 | -2.09502 |
| 6          | 7          | 0.899169                | 1.094986 | 5.816393 |
| 7          | 7          | -0.54547                | -1.26339 | 4.58094  |
| 8          | 7          | 2.67619                 | 1.077129 | 3.413631 |
| 9          | 7          | -0.82311                | -0.97949 | -4.89424 |
| 10         | 7          | -0.65192                | 2.243833 | 3.754134 |
| 11         | 7          | -2.15282                | 0.887432 | -3.17771 |
| 12         | 1          | -1.71909                | 1.738018 | -3.54397 |
| 13         | 6          | -3.19165                | -1.93679 | 1.082465 |
| 14         | 6          | -1.2194                 | -2.41826 | 2.481732 |
| 15         | 7          | -0.91492                | -2.47384 | -2.40013 |
| 16         | 6          | -2.36944                | -2.27136 | 0.016239 |
| 17         | 6          | -2.04533                | 1.909792 | -0.94405 |
| 18         | 6          | -1.05937                | 2.833887 | -1.2995  |
| 19         | 1          | -0.91097                | 3.153464 | -2.3281  |
| 20         | 6          | -0.23317                | 3.448402 | -0.34718 |
| 21         | 6          | -1.4762                 | 2.25941  | 1.405304 |

|    |   |          |          |          |
|----|---|----------|----------|----------|
| 22 | 6 | -0.4789  | -2.69678 | 1.335544 |
| 23 | 1 | 0.564249 | -2.98871 | 1.436527 |
| 24 | 6 | -2.5844  | -2.07118 | 2.358012 |
| 25 | 6 | 0.814064 | 4.357619 | -0.83006 |
| 26 | 6 | 2.523817 | 6.091341 | -1.20726 |
| 27 | 6 | -0.58784 | -2.53842 | 3.856423 |
| 28 | 1 | -1.10918 | -3.33248 | 4.421148 |
| 29 | 1 | 0.445109 | -2.87969 | 3.726548 |
| 30 | 6 | -2.23129 | 1.631787 | 0.422123 |
| 31 | 1 | -3.0139  | 0.940991 | 0.724726 |
| 32 | 6 | 0.302859 | -1.34014 | 5.775903 |
| 33 | 1 | -0.00556 | -2.14662 | 6.466948 |
| 34 | 1 | 1.320885 | -1.58815 | 5.447952 |
| 35 | 6 | -4.55836 | -1.49012 | 0.793957 |
| 36 | 7 | 1.416794 | 0.100795 | -3.40073 |
| 37 | 6 | -1.05684 | -2.66312 | 0.046224 |
| 38 | 6 | 0.318962 | -0.0228  | 6.560824 |
| 39 | 1 | -0.71394 | 0.233846 | 6.826092 |
| 40 | 1 | 0.840473 | -0.19403 | 7.519054 |
| 41 | 6 | -0.45261 | 3.170329 | 1.025512 |
| 42 | 6 | 2.1162   | 5.351046 | -2.34287 |
| 43 | 6 | -2.96266 | 1.316716 | -1.9896  |
| 44 | 1 | -3.49112 | 0.439323 | -1.60408 |
| 45 | 1 | -3.71932 | 2.038097 | -2.32914 |
| 46 | 6 | -1.02008 | 2.486616 | 5.157351 |
| 47 | 1 | -1.78504 | 1.76488  | 5.487767 |
| 48 | 1 | -1.45976 | 3.486608 | 5.250303 |
| 49 | 6 | -1.81569 | 2.060484 | 2.872468 |
| 50 | 1 | -2.55689 | 2.821264 | 3.155323 |
| 51 | 1 | -2.29604 | 1.082575 | 3.025542 |
| 52 | 6 | 2.358261 | 1.160355 | 5.880092 |
| 53 | 1 | 2.735769 | 0.134486 | 5.973131 |
| 54 | 1 | 2.712803 | 1.69693  | 6.779164 |
| 55 | 6 | 4.035756 | 7.365347 | -2.55298 |
| 56 | 1 | 4.780543 | 8.148985 | -2.6531  |
| 57 | 8 | 4.15409  | -1.19201 | 2.219808 |
| 58 | 1 | 4.353902 | -2.14392 | 2.156642 |
| 59 | 6 | 3.525612 | 1.502107 | 2.295006 |
| 60 | 1 | 4.601273 | 1.469964 | 2.552424 |
| 61 | 1 | 3.286332 | 2.546539 | 2.065978 |
| 62 | 6 | 3.010863 | 1.79562  | 4.64676  |

|     |   |          |          |          |
|-----|---|----------|----------|----------|
| 63  | 1 | 2.692539 | 2.840035 | 4.532485 |
| 64  | 1 | 4.100896 | 1.826759 | 4.834128 |
| 65  | 6 | 3.487599 | 7.100511 | -1.30202 |
| 66  | 1 | 3.79655  | 7.667232 | -0.42929 |
| 67  | 6 | 1.258727 | 0.411615 | -4.84903 |
| 68  | 1 | 2.23746  | 0.53808  | -5.32795 |
| 69  | 1 | 0.734604 | 1.370415 | -4.93326 |
| 70  | 6 | 0.228114 | 2.374764 | 6.036937 |
| 71  | 1 | 0.915893 | 3.180739 | 5.764168 |
| 72  | 1 | -0.04835 | 2.538171 | 7.092662 |
| 73  | 6 | 0.489868 | -0.71926 | -5.54674 |
| 74  | 1 | 0.366843 | -0.48889 | -6.61268 |
| 75  | 1 | 1.084716 | -1.63751 | -5.49031 |
| 76  | 6 | -1.91867 | -0.11447 | -5.41228 |
| 77  | 1 | -2.44908 | -0.59701 | -6.24322 |
| 78  | 1 | -1.46666 | 0.798878 | -5.81488 |
| 79  | 6 | -0.55138 | -3.14713 | -3.67871 |
| 80  | 1 | -0.88146 | -4.19324 | -3.67084 |
| 81  | 1 | 0.541849 | -3.15602 | -3.75085 |
| 82  | 6 | -2.9055  | 0.268184 | -4.30017 |
| 83  | 1 | -3.66305 | 0.9548   | -4.69739 |
| 84  | 1 | -3.43463 | -0.60705 | -3.90744 |
| 85  | 6 | -1.1901  | -2.4207  | -4.8677  |
| 86  | 1 | -0.91479 | -2.92152 | -5.80519 |
| 87  | 1 | -2.27989 | -2.49026 | -4.78147 |
| 88  | 6 | 2.683949 | 5.633382 | -3.59739 |
| 89  | 1 | 2.362782 | 5.074677 | -4.47154 |
| 90  | 6 | 3.636781 | 6.63788  | -3.69121 |
| 91  | 1 | 4.079164 | 6.872781 | -4.65462 |
| 92  | 6 | 3.812538 | -2.93168 | -0.216   |
| 93  | 6 | -0.33596 | -3.14232 | -1.19085 |
| 94  | 1 | 0.741989 | -2.96079 | -1.14943 |
| 95  | 1 | -0.46975 | -4.22825 | -1.30257 |
| 96  | 6 | 4.80806  | -5.19346 | -0.10894 |
| 97  | 6 | 3.620274 | -5.05073 | -0.86657 |
| 98  | 6 | 3.070755 | -6.17634 | -1.50079 |
| 99  | 1 | 2.160965 | -6.07426 | -2.08434 |
| 100 | 6 | 3.708934 | -7.40239 | -1.36723 |
| 101 | 1 | 3.294865 | -8.2803  | -1.85342 |
| 102 | 6 | 4.888284 | -7.52603 | -0.60988 |
| 103 | 1 | 5.368451 | -8.49545 | -0.52059 |

|     |    |          |          |          |
|-----|----|----------|----------|----------|
| 104 | 6  | 5.452582 | -6.42475 | 0.028253 |
| 105 | 1  | 6.363584 | -6.52434 | 0.609186 |
| 106 | 6  | 2.216877 | 1.108802 | -2.62729 |
| 107 | 1  | 1.632212 | 2.023946 | -2.49423 |
| 108 | 1  | 3.102364 | 1.372789 | -3.22294 |
| 109 | 6  | -6.8874  | -0.64966 | 0.789125 |
| 110 | 6  | -6.35289 | -1.06671 | -0.45465 |
| 111 | 6  | -7.15805 | -1.00388 | -1.6044  |
| 112 | 1  | -6.75979 | -1.33964 | -2.55688 |
| 113 | 6  | -8.45777 | -0.53015 | -1.48899 |
| 114 | 1  | -9.09361 | -0.48406 | -2.36775 |
| 115 | 6  | -8.97045 | -0.115   | -0.24546 |
| 116 | 1  | -9.99166 | 0.247484 | -0.18132 |
| 117 | 6  | -8.19301 | -0.16871 | 0.908185 |
| 118 | 1  | -8.59475 | 0.147125 | 1.86539  |
| 119 | 6  | 2.973969 | -0.83241 | -1.20636 |
| 120 | 6  | 3.496079 | -1.49856 | -0.11246 |
| 121 | 6  | 3.66662  | -0.70273 | 1.050225 |
| 122 | 6  | 3.311942 | 0.667162 | 1.04686  |
| 123 | 6  | 2.808205 | 1.238026 | -0.12037 |
| 124 | 1  | 2.557008 | 2.295692 | -0.11855 |
| 125 | 6  | 2.63554  | 0.495172 | -1.31121 |
| 126 | 7  | 3.08774  | -3.76999 | -0.90166 |
| 127 | 1  | -1.49619 | -1.03893 | 4.871094 |
| 128 | 1  | 2.83809  | 0.084524 | 3.573896 |
| 129 | 1  | -0.04346 | 1.415635 | 3.741569 |
| 130 | 8  | -3.24775 | -1.83249 | 3.52742  |
| 131 | 1  | -4.19567 | -2.04426 | 3.454852 |
| 132 | 16 | -5.65879 | -0.82475 | 2.025019 |
| 133 | 7  | -5.04699 | -1.52328 | -0.41673 |
| 134 | 30 | -0.53445 | -0.40008 | -2.72738 |
| 135 | 1  | 1.955077 | -0.77048 | -3.33038 |
| 136 | 1  | -1.93281 | -2.54548 | -2.2855  |

### Cryptand with metal (Cavity 2)

| Serial No. | Atomic No. | Coordinates (Angstroms) |          |          |
|------------|------------|-------------------------|----------|----------|
|            |            | X                       | Y        | Z        |
| 1          | 16         | -5.22915                | -2.31499 | 0.322507 |
| 2          | 16         | -1.04039                | 6.336437 | 0.325894 |
| 3          | 8          | -2.8677                 | -3.06726 | 2.007163 |



|    |   |          |          |          |
|----|---|----------|----------|----------|
| 4  | 1 | -3.74887 | -3.39684 | 1.744481 |
| 5  | 7 | -4.32094 | -3.13468 | -1.98738 |
| 6  | 7 | -0.56931 | -0.03171 | 5.542332 |
| 7  | 7 | 1.60972  | 0.700768 | 3.777833 |
| 8  | 7 | -1.95364 | 1.291281 | 3.344981 |
| 9  | 7 | 0.869915 | 0.081981 | -5.45491 |
| 10 | 7 | -0.746   | -2.14158 | 3.563568 |
| 11 | 7 | 0.354759 | -2.28315 | -3.58153 |
| 12 | 1 | -0.35115 | -2.94748 | -3.89804 |
| 13 | 6 | 3.560013 | -0.71654 | 0.078254 |
| 14 | 6 | 2.472122 | 1.026163 | 1.453933 |
| 15 | 7 | 2.530953 | 1.337342 | -3.29734 |
| 16 | 6 | 3.14656  | -0.09516 | -1.12245 |
| 17 | 6 | -0.16192 | -2.75369 | -1.19125 |
| 18 | 6 | -1.52996 | -2.74121 | -1.44272 |
| 19 | 1 | -1.9064  | -2.6559  | -2.45434 |
| 20 | 6 | -2.49112 | -2.82556 | -0.41247 |
| 21 | 6 | -0.65453 | -2.93943 | 1.194867 |
| 22 | 6 | 2.047475 | 1.656555 | 0.28763  |
| 23 | 1 | 1.481807 | 2.585591 | 0.346944 |
| 24 | 6 | 3.258815 | -0.14723 | 1.335028 |
| 25 | 6 | -3.9123  | -2.81984 | -0.7993  |
| 26 | 6 | -6.39025 | -2.62183 | -0.95649 |
| 27 | 6 | 2.25493  | 1.653872 | 2.803975 |
| 28 | 1 | 3.207317 | 1.976902 | 3.246117 |
| 29 | 1 | 1.609769 | 2.53353  | 2.716111 |
| 30 | 6 | 0.258482 | -2.83757 | 0.144597 |
| 31 | 1 | 1.322665 | -2.85781 | 0.366023 |
| 32 | 6 | 1.527579 | 1.264127 | 5.155428 |
| 33 | 1 | 2.531182 | 1.448709 | 5.55725  |
| 34 | 1 | 1.027045 | 2.236667 | 5.087712 |
| 35 | 6 | 4.369937 | -1.95487 | -0.02717 |
| 36 | 7 | -1.24006 | 0.934555 | -3.71137 |
| 37 | 1 | -0.49513 | 0.310691 | -3.39755 |
| 38 | 6 | 2.411675 | 1.108156 | -0.95471 |
| 39 | 6 | 0.768294 | 0.317744 | 6.091921 |
| 40 | 1 | 1.339479 | -0.60931 | 6.206777 |
| 41 | 1 | 0.684026 | 0.764452 | 7.091501 |
| 42 | 6 | -2.03311 | -2.9469  | 0.909789 |
| 43 | 6 | -5.69412 | -3.0386  | -2.11775 |
| 44 | 6 | 0.882706 | -2.71686 | -2.29082 |

|    |   |          |          |          |
|----|---|----------|----------|----------|
| 45 | 1 | 1.674675 | -2.01055 | -2.00682 |
| 46 | 1 | 1.364696 | -3.71324 | -2.33543 |
| 47 | 6 | -0.42338 | -2.45783 | 4.985173 |
| 48 | 1 | 0.667413 | -2.50745 | 5.077432 |
| 49 | 1 | -0.81419 | -3.44592 | 5.257328 |
| 50 | 6 | -0.17733 | -3.15672 | 2.608423 |
| 51 | 1 | -0.4773  | -4.15126 | 2.965318 |
| 52 | 1 | 0.913548 | -3.09879 | 2.656607 |
| 53 | 6 | -1.59773 | 1.010436 | 5.800264 |
| 54 | 1 | -1.08856 | 1.976033 | 5.884272 |
| 55 | 1 | -2.11003 | 0.838158 | 6.756055 |
| 56 | 6 | -8.47267 | -2.78883 | -2.10921 |
| 57 | 1 | -9.5547  | -2.70079 | -2.12205 |
| 58 | 8 | -1.52465 | 3.719856 | 2.063721 |
| 59 | 1 | -1.14305 | 4.608402 | 1.920516 |
| 60 | 6 | -2.95136 | 1.335743 | 2.21703  |
| 61 | 1 | -3.76919 | 1.999639 | 2.530155 |
| 62 | 1 | -3.36883 | 0.332707 | 2.091951 |
| 63 | 6 | -2.62325 | 1.080818 | 4.663094 |
| 64 | 1 | -3.20645 | 0.155342 | 4.596555 |
| 65 | 1 | -3.33335 | 1.892278 | 4.864255 |
| 66 | 6 | -7.77969 | -2.49198 | -0.9375  |
| 67 | 1 | -8.30844 | -2.17559 | -0.04429 |
| 68 | 6 | -1.54183 | 0.555178 | -5.09105 |
| 69 | 1 | -2.36217 | 1.180891 | -5.46484 |
| 70 | 1 | -1.87767 | -0.49397 | -5.17806 |
| 71 | 6 | -1.01364 | -1.39902 | 5.922746 |
| 72 | 1 | -2.10628 | -1.43262 | 5.858407 |
| 73 | 1 | -0.75035 | -1.62848 | 6.963566 |
| 74 | 6 | -0.30779 | 0.790967 | -5.9667  |
| 75 | 1 | -0.53229 | 0.52088  | -7.01335 |
| 76 | 1 | -0.09335 | 1.864579 | -5.95517 |
| 77 | 6 | 0.924486 | -1.3433  | -5.8005  |
| 78 | 1 | 1.578767 | -1.5254  | -6.6696  |
| 79 | 1 | -0.07716 | -1.66901 | -6.10287 |
| 80 | 6 | 2.383067 | 1.890634 | -4.64083 |
| 81 | 1 | 3.308006 | 2.419977 | -4.90414 |
| 82 | 1 | 1.567981 | 2.619334 | -4.62021 |
| 83 | 6 | 1.389785 | -2.20686 | -4.62271 |
| 84 | 1 | 1.687052 | -3.20322 | -4.99301 |
| 85 | 1 | 2.286726 | -1.76472 | -4.17381 |

|     |   |          |          |          |
|-----|---|----------|----------|----------|
| 86  | 6 | 2.125863 | 0.786083 | -5.67601 |
| 87  | 1 | 2.193397 | 1.244025 | -6.67906 |
| 88  | 1 | 2.949863 | 0.065659 | -5.61508 |
| 89  | 6 | -6.41382 | -3.33209 | -3.28673 |
| 90  | 1 | -5.88038 | -3.65666 | -4.17398 |
| 91  | 6 | -7.79658 | -3.20408 | -3.27098 |
| 92  | 1 | -8.36694 | -3.43059 | -4.16637 |
| 93  | 6 | -0.48906 | 4.837421 | -0.47825 |
| 94  | 6 | 2.090479 | 1.819237 | -2.17634 |
| 95  | 1 | -1.09728 | 3.19735  | -2.48011 |
| 96  | 1 | 1.53103  | 2.754723 | -2.17662 |
| 97  | 6 | 0.366105 | 7.159981 | -0.32565 |
| 98  | 6 | 1.103388 | 6.252529 | -1.12471 |
| 99  | 6 | 2.262089 | 6.694709 | -1.78122 |
| 100 | 1 | 2.828601 | 6.002174 | -2.39526 |
| 101 | 6 | 2.654188 | 8.0185   | -1.62958 |
| 102 | 1 | 3.546819 | 8.375203 | -2.13389 |
| 103 | 6 | 1.909591 | 8.907921 | -0.83367 |
| 104 | 1 | 2.236013 | 9.938406 | -0.7333  |
| 105 | 6 | 0.756538 | 8.49169  | -0.17251 |
| 106 | 1 | 0.182961 | 9.183844 | 0.435223 |
| 107 | 6 | -2.37706 | 0.843427 | -2.80289 |
| 108 | 1 | -2.69098 | -0.19154 | -2.58002 |
| 109 | 1 | -3.23701 | 1.318337 | -3.29596 |
| 110 | 6 | 5.415399 | -4.21234 | 0.277958 |
| 111 | 6 | 5.820909 | -3.43978 | -0.83806 |
| 112 | 6 | 6.786851 | -3.95393 | -1.7162  |
| 113 | 1 | 7.099966 | -3.35917 | -2.56793 |
| 114 | 6 | 7.320649 | -5.21259 | -1.46712 |
| 115 | 1 | 8.070331 | -5.62033 | -2.13821 |
| 116 | 6 | 6.906534 | -5.96675 | -0.35529 |
| 117 | 1 | 7.339968 | -6.94676 | -0.18022 |
| 118 | 6 | 5.949135 | -5.47665 | 0.531181 |
| 119 | 1 | 5.63527  | -6.06308 | 1.388758 |
| 120 | 6 | -1.45341 | 2.815711 | -1.5299  |
| 121 | 6 | -1.24079 | 3.573217 | -0.36888 |
| 122 | 6 | -1.7079  | 3.069099 | 0.85908  |
| 123 | 6 | -2.35845 | 1.824954 | 0.918021 |
| 124 | 6 | -2.5456  | 1.100479 | -0.26647 |
| 125 | 1 | -3.07024 | 0.149051 | -0.22191 |
| 126 | 6 | -2.10753 | 1.583944 | -1.50322 |

|     |    |          |          |          |
|-----|----|----------|----------|----------|
| 127 | 7  | 0.597523 | 4.961217 | -1.17847 |
| 128 | 1  | 3.053118 | 0.447006 | -3.10619 |
| 129 | 8  | 3.692687 | -0.65432 | 2.542889 |
| 130 | 1  | 4.327887 | -1.38543 | 2.399294 |
| 131 | 16 | 4.199792 | -3.31813 | 1.173039 |
| 132 | 7  | 5.21908  | -2.19972 | -0.96584 |
| 133 | 30 | -0.31311 | -0.06929 | 3.335011 |
| 134 | 1  | 2.258135 | -0.09573 | 3.796929 |
| 135 | 1  | -1.54883 | 2.234936 | 3.351157 |
| 136 | 1  | -1.76125 | -2.24017 | 3.447958 |

### Thermal Corrections

| Parameters<br>(Energy given in HF)             | Metal Free<br>Cryptand | Metal in Cavity 1 | Metal in Cavity 2 | Metal Outside to<br>Cryptand |
|------------------------------------------------|------------------------|-------------------|-------------------|------------------------------|
| Zero-point correction                          | 1.138768               | 1.120793          | 1.122310          | 1.147796                     |
| Thermal correction to energy                   | 1.203321               | 1.186138          | 1.187426          | 1.217912                     |
| Thermal correction to enthalpy                 | 1.204265               | 1.187082          | 1.188371          | 1.218856                     |
| Thermal correction to Gibbs<br>free energy     | 1.035348               | 1.018499          | 1.020781          | 1.036068                     |
| Sum of electronic and zero-point<br>energies   | -4231.434994           | -4295.173033      | -4295.257201      | -4576.682393                 |
| Sum of electronic and thermal<br>energies      | -4231.370441           | -4295.107687      | -4295.192084      | -4576.612278                 |
| Sum of electronic and thermal<br>enthalpies    | -4231.369497           | -4295.106743      | -4295.191140      | -4576.611333                 |
| Sum of electronic and thermal<br>free energies | -4231.538414           | -4295.275326      | -4295.358730      | -4576.794122                 |
